# Supplementary material
Source: Royal Society of Chemistry journal article supplement (doi:10.1039/d6ta02481e)
Supplement: d6ta02481e1.pdf [file d6ta02481e1.pdf]

## Supporting Information

### **Construction of Janus particles from single-domain ferroelectric PbTiO<sub>3</sub> nanoplates for synergistic photocatalytic H<sub>2</sub> evolution and value-added organic transformation**

Yuchen Fang,<sup>a</sup> Chenyang Sun,<sup>a</sup> Xuan Zhan,<sup>a</sup> Zheng Xing,<sup>\*a</sup> Gang Liu <sup>\*b</sup> and Gangfeng Ouyang <sup>\*a</sup>

<sup>a</sup> School of Chemical Engineering and Technology, Sun Yat-sen University, Zhuhai 519082, China

<sup>b</sup> Shenyang National Laboratory for Materials Science, Institute of Metal Research, Chinese Academy of Sciences, Shenyang 110016, China

\*Corresponding author. Zheng Xing, [xingzh7@mail.sysu.edu.cn](mailto:xingzh7@mail.sysu.edu.cn); Gang Liu, [gangliu@imr.ac.cn](mailto:gangliu@imr.ac.cn); Gangfeng Ouyang, [cesoygf@mail.sysu.edu.cn](mailto:cesoygf@mail.sysu.edu.cn)

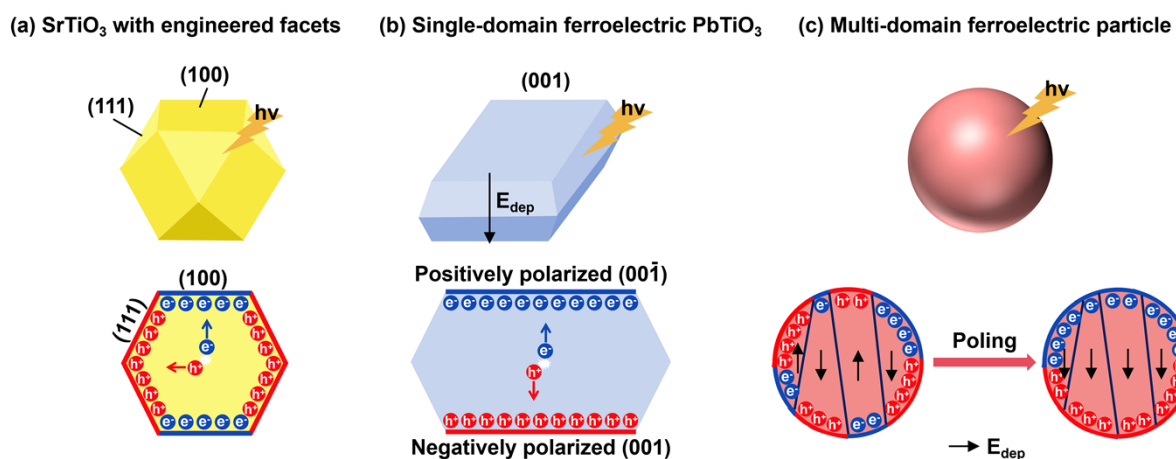

**Fig. S1** Schematic illustration of charge separation mechanism within (a) SrTiO<sub>3</sub> with engineered facets, (b) single-domain ferroelectric PbTiO<sub>3</sub> and (c) multi-domain ferroelectric particle.

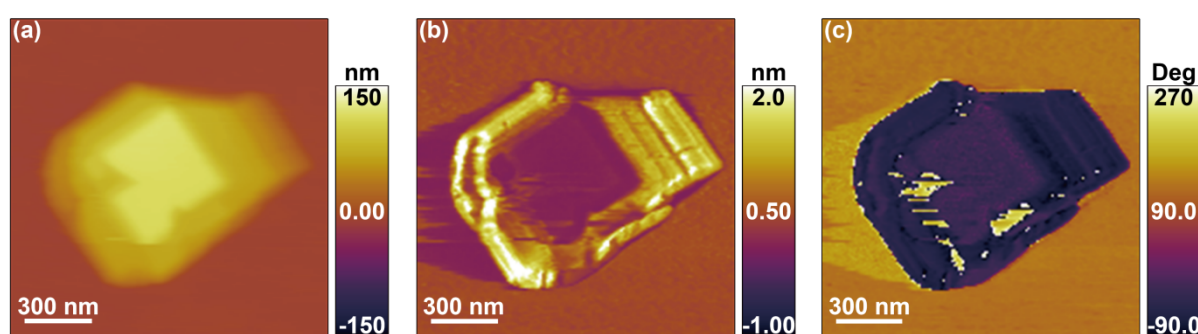

**Fig. S2** (a) Topography, (b) amplitude, and (c) phase images of the PbTiO<sub>3</sub> nanoplates.

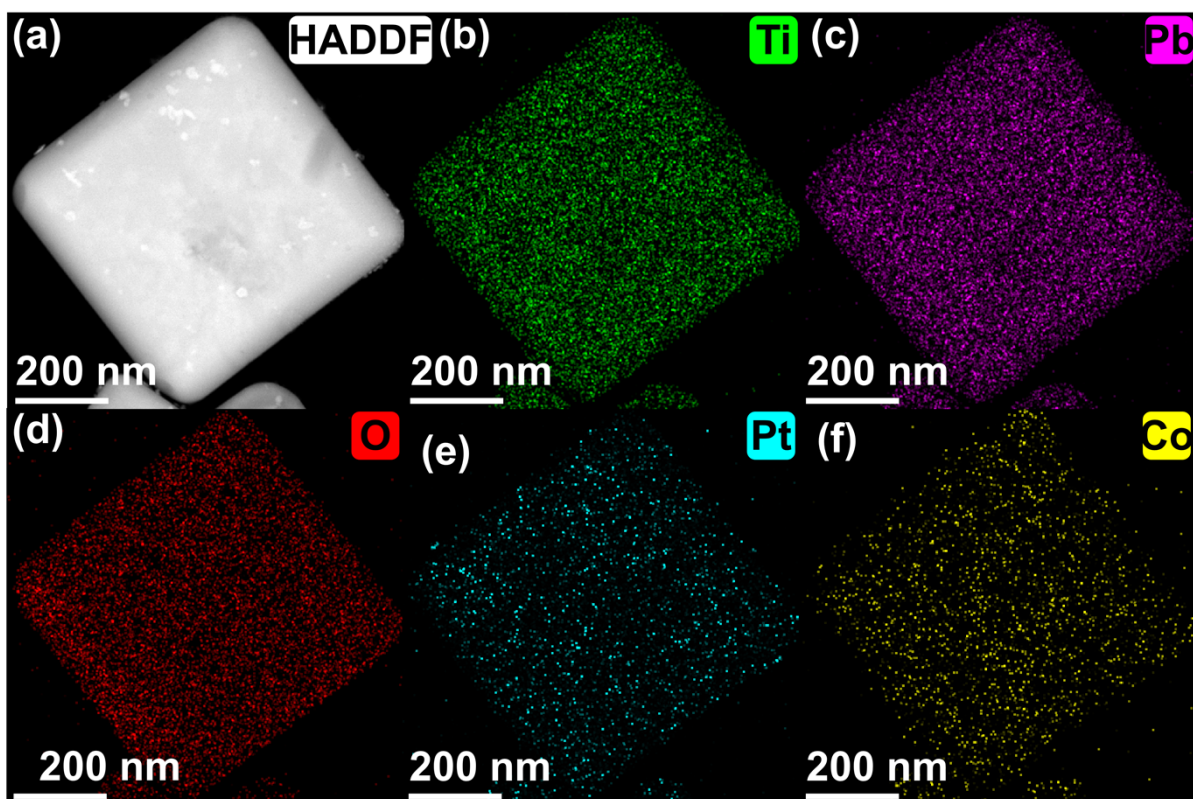

**Fig. S3** (a) Top-view HAADF-STEM image and (b-f) corresponding elemental maps of  $\text{PbTiO}_3\text{-Pt-CoO}_x$ .

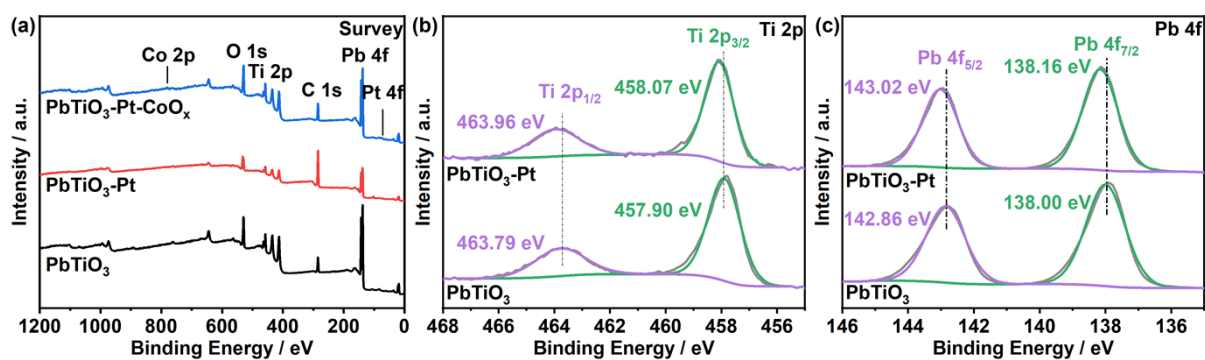

**Fig. S4** (a) XPS survey spectra of  $\text{PbTiO}_3$ ,  $\text{PbTiO}_3\text{-Pt}$  and  $\text{PbTiO}_3\text{-Pt-CoO}_x$ . High-resolution XPS spectra of  $\text{PbTiO}_3$ ,  $\text{PbTiO}_3\text{-Pt-CoO}_x$  for (b) Ti 2p and (c) Pb 4f.

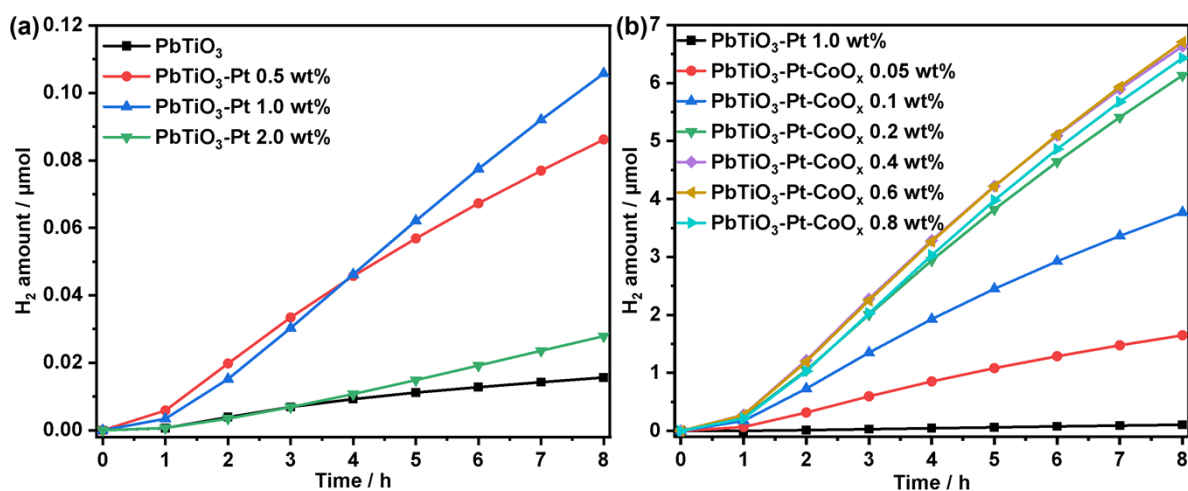

**Fig. S5** H<sub>2</sub> generation time profiles of (a) PbTiO<sub>3</sub>-Pt with different content of Pt and (b) PbTiO<sub>3</sub>-Pt 1.0 wt%-CoO<sub>x</sub> with different amount of CoO<sub>x</sub>.

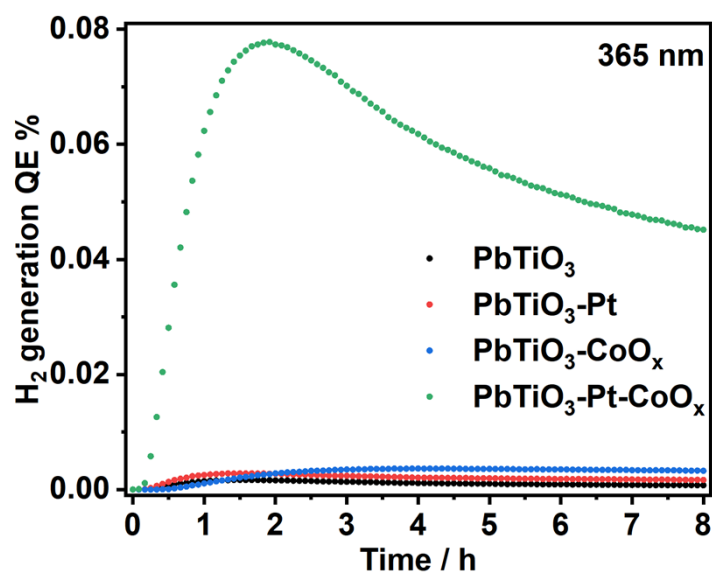

**Fig. S6** AQE time profile at 365 nm of PbTiO<sub>3</sub>, PbTiO<sub>3</sub>-Pt, PbTiO<sub>3</sub>-CoO<sub>x</sub> and PbTiO<sub>3</sub>-Pt-CoO<sub>x</sub>.

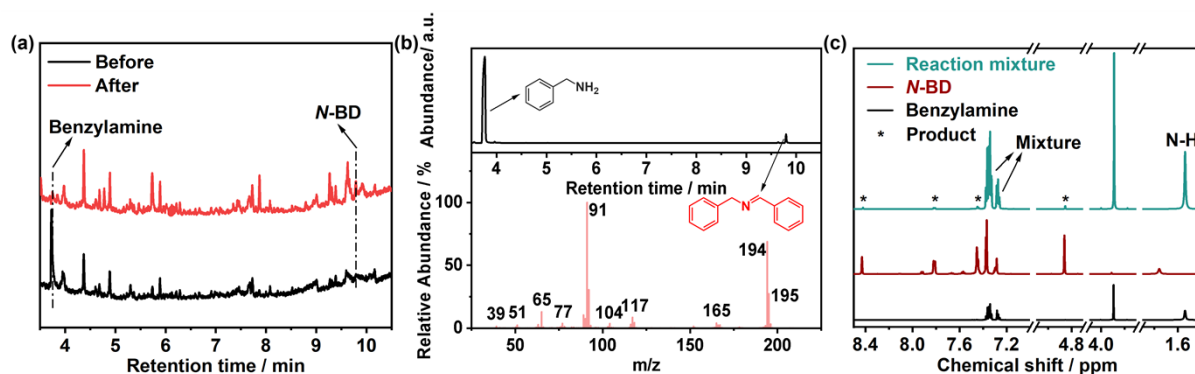

**Fig. S7** The main product of BOR was confirmed by gas chromatogram-mass spectrogram (GC-MS) and  $^1\text{H}$  NMR. (a) The GC traces of reaction mixture before and after photocatalytic reaction at a very low benzylamine concentration ( $100\ \mu\text{M}$ ) with 365 nm LED as the light source. (b) The GC trace (upper) and the corresponding MS spectrum (lower) at the retention time of 9.796 min for the liquid products. The  $m/z$  of 195 is in agreement with the theoretical  $m/z$  value for N-BD. (c)  $^1\text{H}$  NMR spectrum of the standard N-BD and benzylamine and the reaction solution after photocatalytic BOR coupled with HER.

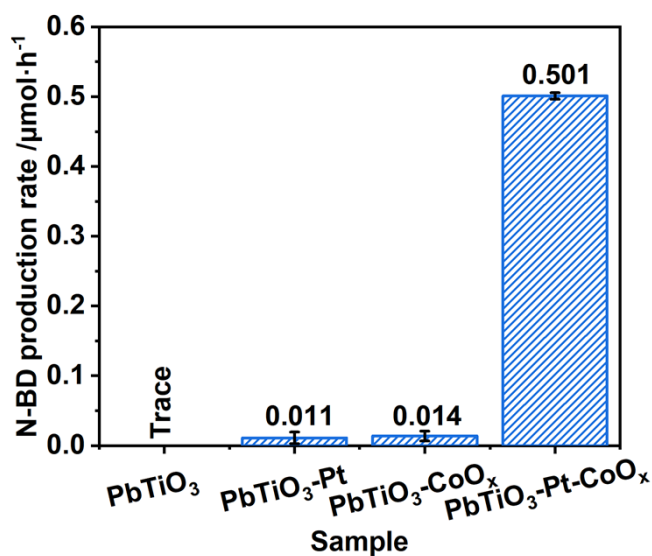

**Fig. S8** Average photocatalytic production rates of N-BD using  $\text{PbTiO}_3$ ,  $\text{PbTiO}_3\text{-Pt}$ ,  $\text{PbTiO}_3\text{-CoO}_x$ , and  $\text{PbTiO}_3\text{-Pt-CoO}_x$  as the catalysts with  $200\ \mu\text{L}$  benzylamine.

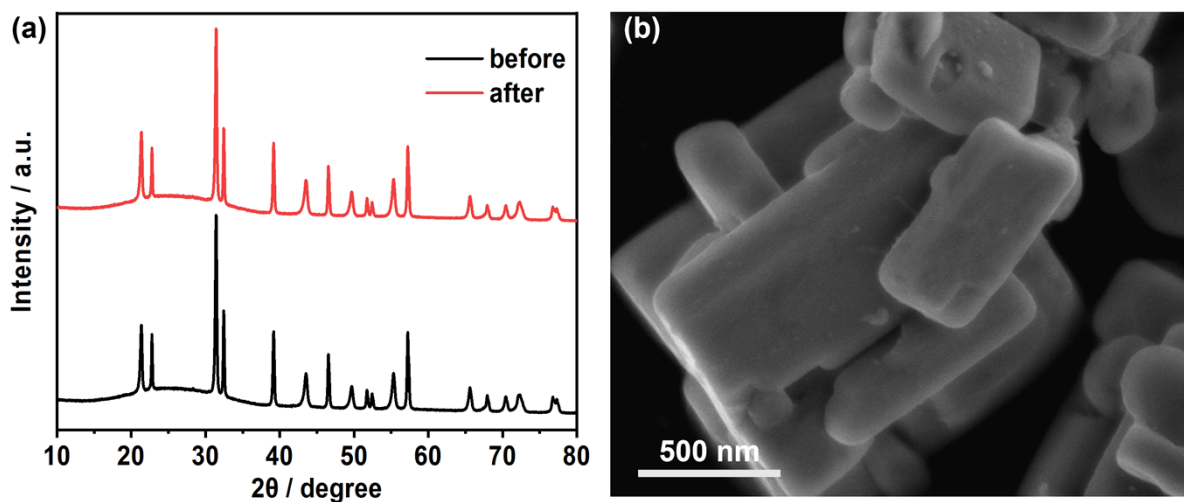

**Fig. S9** (a) XRD patterns of  $\text{PbTiO}_3\text{-Pt-CoO}_x$  before and after the reusability test. (b) The SEM image of  $\text{PbTiO}_3\text{-Pt-CoO}_x$  after the reaction.

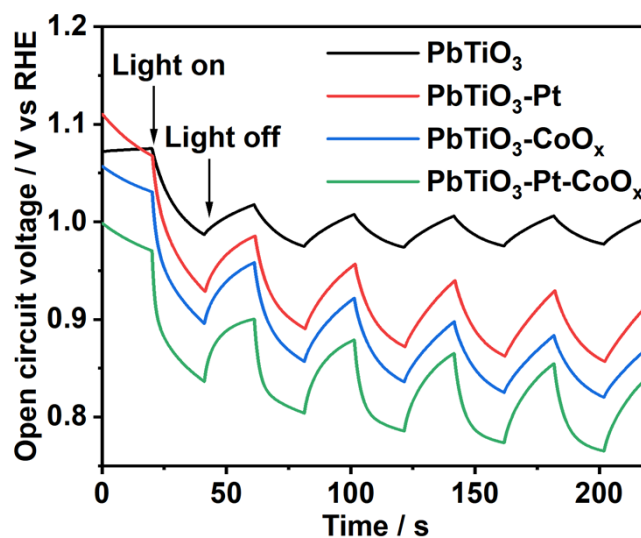

**Fig. S10** OCV response to light on/off of  $\text{PbTiO}_3$ ,  $\text{PbTiO}_3\text{-Pt}$ ,  $\text{PbTiO}_3\text{-CoO}_x$  and  $\text{PbTiO}_3\text{-Pt-CoO}_x$  measured in the 0.5 M  $\text{Na}_2\text{SO}_4$  and 0.1 M benzylamine mixed aqueous solution.

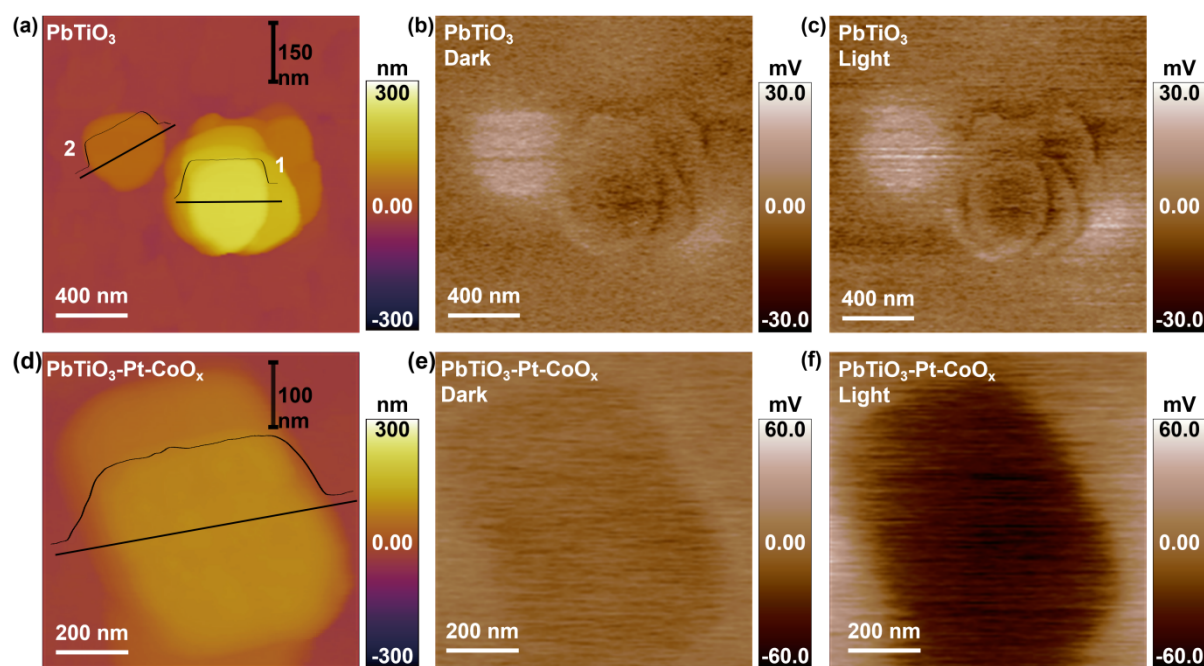

**Fig. S11** AFM and spatially distribution of CPD signals in the dark and under illumination of (a-c)  $\text{PbTiO}_3$  and (d-e)  $\text{PbTiO}_3\text{-Pt-CoO}_x$ .

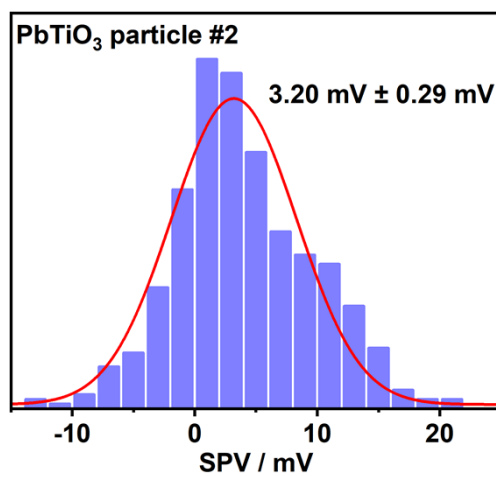

**Fig. S12** SPV distribution of  $\text{PbTiO}_3$  particle #2 obtained from the sample areas of the SPV image of  $\text{PbTiO}_3$ .

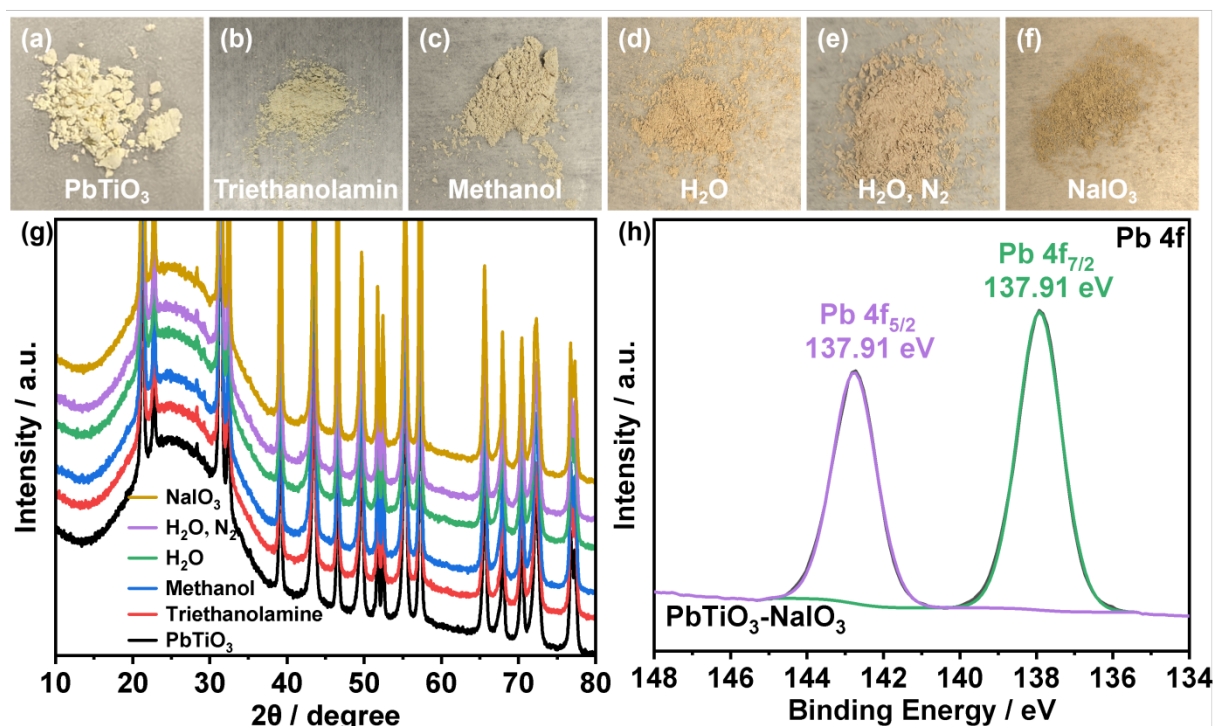

**Fig. S13** PbTiO<sub>3</sub> was illuminated under various conditions with a 300 W Xe lamp. The photographs of (a) pristine PbTiO<sub>3</sub>, (b) triethanolamine, (c) methanol, (d) H<sub>2</sub>O, (e) H<sub>2</sub>O and N<sub>2</sub>, and (f) NaIO<sub>3</sub>. (g) XRD patterns of colored PbTiO<sub>3</sub>. (h) High-resolution XPS spectrum of PbTiO<sub>3</sub>-NaIO<sub>3</sub> for Pb 4f.

Notably, the color of PbTiO<sub>3</sub> exhibited negligible variation in the presence of hole scavengers (triethanolamine and methanol), but turned to reddish in their absence. The XRD patterns of colored PbTiO<sub>3</sub> samples showed no obvious change, indicating that no major catalyst degradation occurred. Furthermore, in the high-resolution spectrum of Pb 4f of PbTiO<sub>3</sub>-NaIO<sub>3</sub>, the most strongly colored sample, two separate peaks at 142.76 and 137.91 eV were indexed to Pb 4f<sub>5/2</sub> and Pb 4f<sub>7/2</sub> of Pb<sup>2+</sup>, respectively, conforming that Pb remained in its original state. It was speculated that the accumulated photogenerated holes induced the partial lattice distortion in PbTiO<sub>3</sub> (undetectable by XRD), thereby resulting in the color changes and the appearance of new peaks in the high-resolution in-situ XPS spectra of Pb 4f.

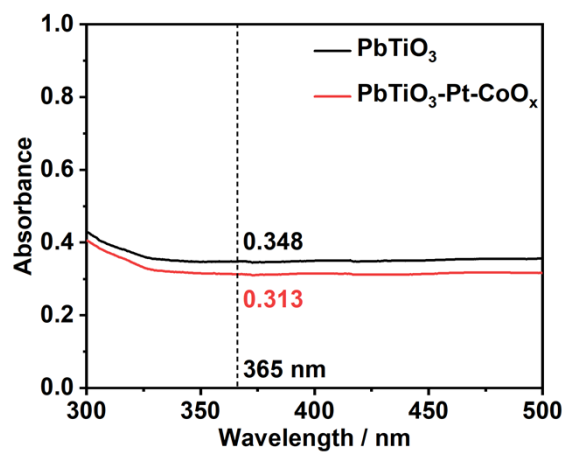

**Fig. S14** The UV-Visible absorption spectra of  $\text{PbTiO}_3$  and  $\text{PbTiO}_3\text{-Pt-CoO}_x$  photoanodes.

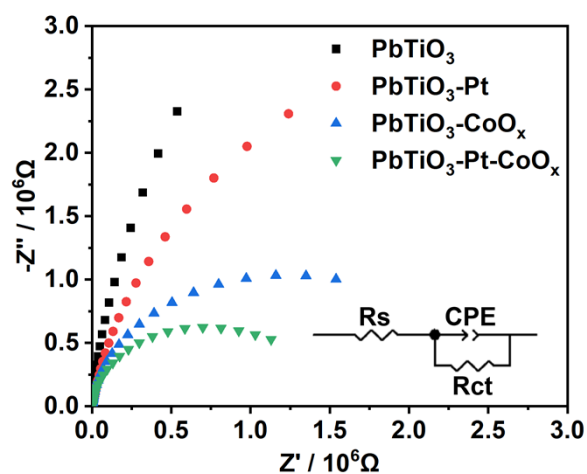

**Fig. S15** EIS Nyquist plots and the corresponding equivalent circuit of  $\text{PbTiO}_3$ ,  $\text{PbTiO}_3\text{-Pt}$ ,  $\text{PbTiO}_3\text{-CoO}_x$  and  $\text{PbTiO}_3\text{-Pt-CoO}_x$  measured in 0.5 M  $\text{Na}_2\text{SO}_4$  and 0.1 M benzylamine mixed aqueous solution.

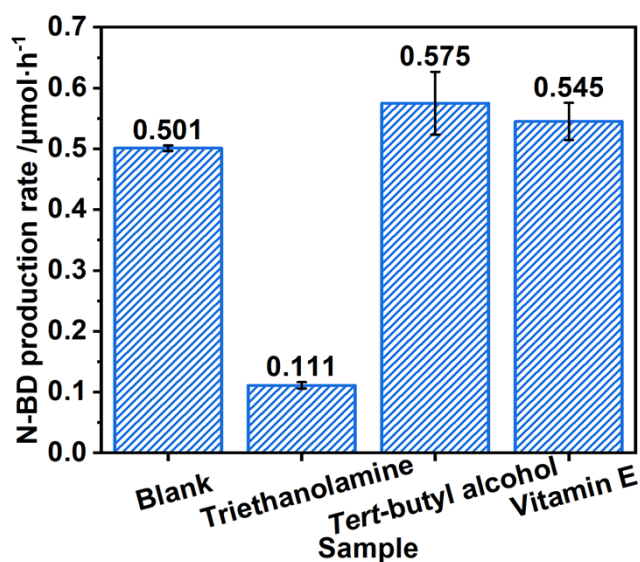

**Fig. S16** Average photocatalytic BOR rates of  $\text{PbTiO}_3\text{-Pt-CoO}_x$  with different scavengers.

**Table S1** Comparison of photocatalysts for synergistic HER-BOR dual-functional reaction.

| Photocatalysts <sup>[Ref.]</sup>                                        | Light source                      | Reaction solution                                                                         | Catalyst amount (mg) | H <sub>2</sub> evolution rate ( $\mu\text{mol}\cdot\text{g}^{-1}\cdot\text{h}^{-1}$ ) | N-BD production rate ( $\mu\text{mol}\cdot\text{g}^{-1}\cdot\text{h}^{-1}$ ) |
|-------------------------------------------------------------------------|-----------------------------------|-------------------------------------------------------------------------------------------|----------------------|---------------------------------------------------------------------------------------|------------------------------------------------------------------------------|
| $\text{In}_{4/3}\text{P}_2\text{Se}_6$ <sup>[1]</sup>                   | 300 W Xe lamp, $\lambda > 300$ nm | 20 mL acetonitrile<br>100 $\mu\text{L}$ H <sub>2</sub> O<br>0.2 mmol benzylamine          | 20                   | 55.94                                                                                 | 42.56                                                                        |
| $\text{Pt@UiO-66-NH}_2\text{@ZnIn}_2\text{S}_4$ <sup>[2]</sup>          | 300 W Xe lamp, $\lambda > 420$ nm | 20 mL acetonitrile<br>500 $\mu\text{L}$ H <sub>2</sub> O<br>100 $\mu\text{L}$ benzylamine | 20                   | 850                                                                                   | yield 78%                                                                    |
| $\text{CuS/TiO}_2$ <sup>[3]</sup>                                       | 300 W Xe lamp                     | 40 mL DMF<br>500 $\mu\text{L}$ H <sub>2</sub> O<br>400 $\mu\text{L}$ benzylamine          | 20                   | 705.8                                                                                 | 881.3                                                                        |
| $\text{Pd}_{\text{SA+C}}/\text{TiO}_2\text{-V}_\text{O}$ <sup>[4]</sup> | 300 W Xe lamp                     | 50 mL DMF<br>500 $\mu\text{L}$ H <sub>2</sub> O<br>500 $\mu\text{L}$ benzylamine          | 10                   | 585.4                                                                                 | 257.3                                                                        |
| $\text{Pt/PCN-777}$ <sup>[5]</sup>                                      | 300 W Xe lamp                     | 5 mL DMF<br>50 $\mu\text{L}$ H <sub>2</sub> O<br>50 $\mu\text{L}$ benzylamine             | 10                   | 332                                                                                   | 486                                                                          |
| This work<br>$\text{PbTiO}_3\text{-Pt-CoO}_x$                           | 300 W Xe lamp,<br>AM 1.5G filter  | 20 mL of water-acetonitrile<br>(60/40) mixtures<br>500 $\mu\text{L}$ of benzylamine       | 10                   | 82.97                                                                                 | 50.10                                                                        |

**Table S2** Fitted EIS data.

| Sample                                  | Rs ( $\Omega$ ) | Rct ( $\Omega$ )      |
|-----------------------------------------|-----------------|-----------------------|
| PbTiO <sub>3</sub>                      | 1762            | 2.94×10 <sup>12</sup> |
| PbTiO <sub>3</sub> -Pt                  | 28.13           | 1.81×10 <sup>7</sup>  |
| PbTiO <sub>3</sub> -CoO <sub>x</sub>    | 27.01           | 2.23×10 <sup>6</sup>  |
| PbTiO <sub>3</sub> -Pt-CoO <sub>x</sub> | 27.28           | 1.41×10 <sup>6</sup>  |

**Reference**

- 1 B. Wu, X. Zhan, P. Yu, J. Meng, M. G. Sendeku, F. T. Dajan, N. Gao, W. Lai, Y. Yang, Z. Wang and F. Wang, *Nanoscale*, 2022, **14**, 15442-15450.
- 2 L. Wang, Y. Zhao, B. Zhang, G. Wu, J. Wu and H. Hou, *Catal. Sci. Technol.*, 2023, **13**, 2517-2528.
- 3 J. Liu, X. Sun, Y. Fan, Y. Yu, Q. Li, J. Zhou, H. Gu, K. Shi and B. Jiang, *Small*, 2024, **20**, 2306344.
- 4 T. Wang, X. Tao, X. Li, K. Zhang, S. Liu and B. Li, *Small*, 2021, **17**, 2006255.
- 5 H. Liu, C. Xu, D. Li and H. Jiang, *Angew. Chem. Int. Ed.*, 2018, **130**, 5477-5481.
